# Supplementary material
Source: PubMed Central journal article supplement (PMC6624820)

## Supplementary Online Content

Bauml JM, Mick R, Ciunci C, et al. Pembrolizumab after completion of locally ablative therapy for oligometastatic non–small cell lung cancer: a phase 2 trial. *JAMA Oncol*. Published online July 11, 2019. doi:10.1001/jamaoncol.2019.1449

**eTable 1.** Therapy After Progression on Trial

**eTable 2.** FACT-L Quality-of-Life Data

**eFigure 1.** Progression-Free Survival From Start of Locally Ablative Therapy by Metastatic Timing

**eFigure 2.** Progression-Free Survival From Start of Locally Ablative Therapy by PD-L1 Status

**eFigure 3.** Box Plot of FACT-L Total Score at Baseline, Week 8, and Week 16, Showing Median and Interquartile Range

This supplementary material has been provided by the authors to give readers additional information about their work.

**eTable 1. Therapy After Progression on Trial**

| Subsequent therapy          | n  | %     |
|-----------------------------|----|-------|
| Chemotherapy                | 11 | 47.8% |
| Stereotactic Radiation      | 10 | 43.5% |
| Standard Fraction Radiation | 6  | 26.1% |
| No further therapy          | 6  | 26.1% |
| Immunotherapy               | 4  | 17.4% |
| Chemoradiotherapy           | 1  | 4.3%  |
| Interventional Ablation     | 1  | 4.3%  |
| Targeted therapy            | 1  | 4.3%  |

**eTable 2. FACT-L Quality-of-Life Data**

|                               | FACT-L Total Score |              |
|-------------------------------|--------------------|--------------|
|                               | Cycle 8            | Cycle 16     |
| Number with paired data       | 20                 | 9            |
| Baseline Mean <sup>+</sup>    | 109.15             | 111.61       |
| Follow-up Mean                | 104.80             | 112.78       |
| Paired difference*, Mean (SE) | 4.35 (3.90)        | -1.17 (9.24) |
| P value                       | 0.28               | 0.90         |

<sup>+</sup> Baseline Mean values are based on the number of patients with paired data for that time point.

<sup>\*</sup> Paired difference = baseline minus follow-up.

eFigure 1. Progression-Free Survival From Start of Locally Ablative Therapy by Metastatic Timing

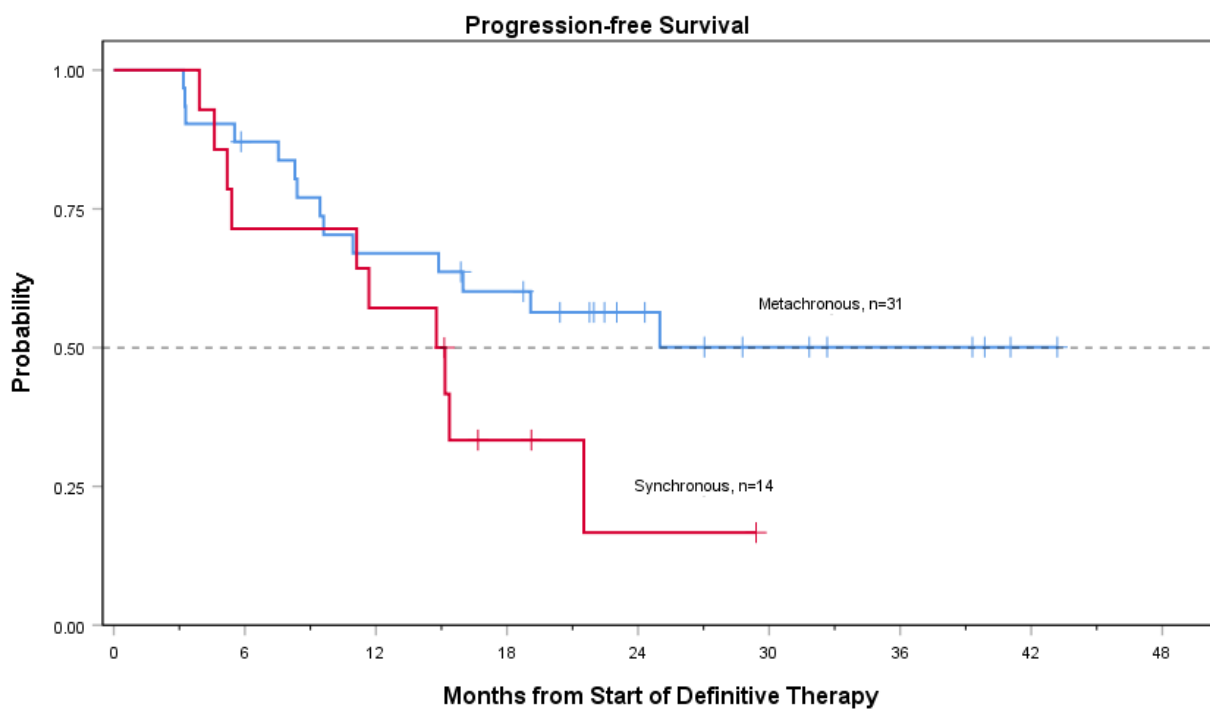

P = .10 by log-rank test

eFigure 2. Progression-Free Survival From Start of Locally Ablative Therapy by PD-L1 Status

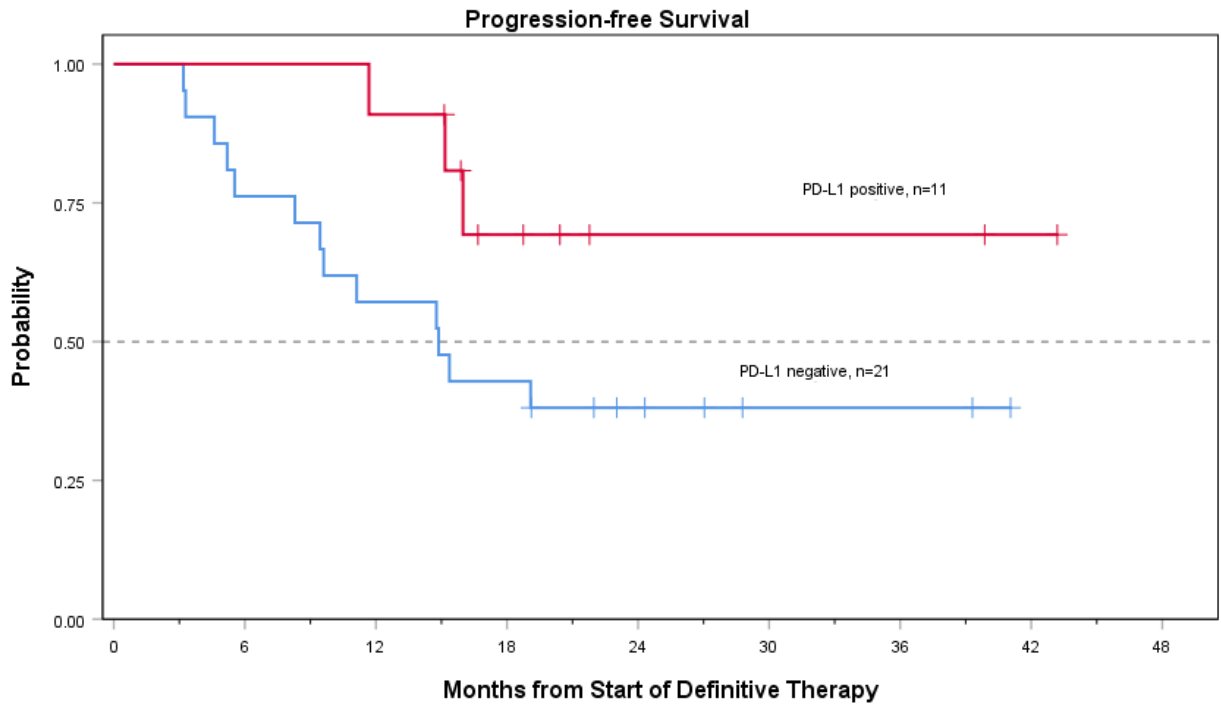

P = .06 by log-rank test

eFigure 3. Box Plot of FACT-L Total Score at Baseline, Week 8, and Week 16, Showing Median and Interquartile Range

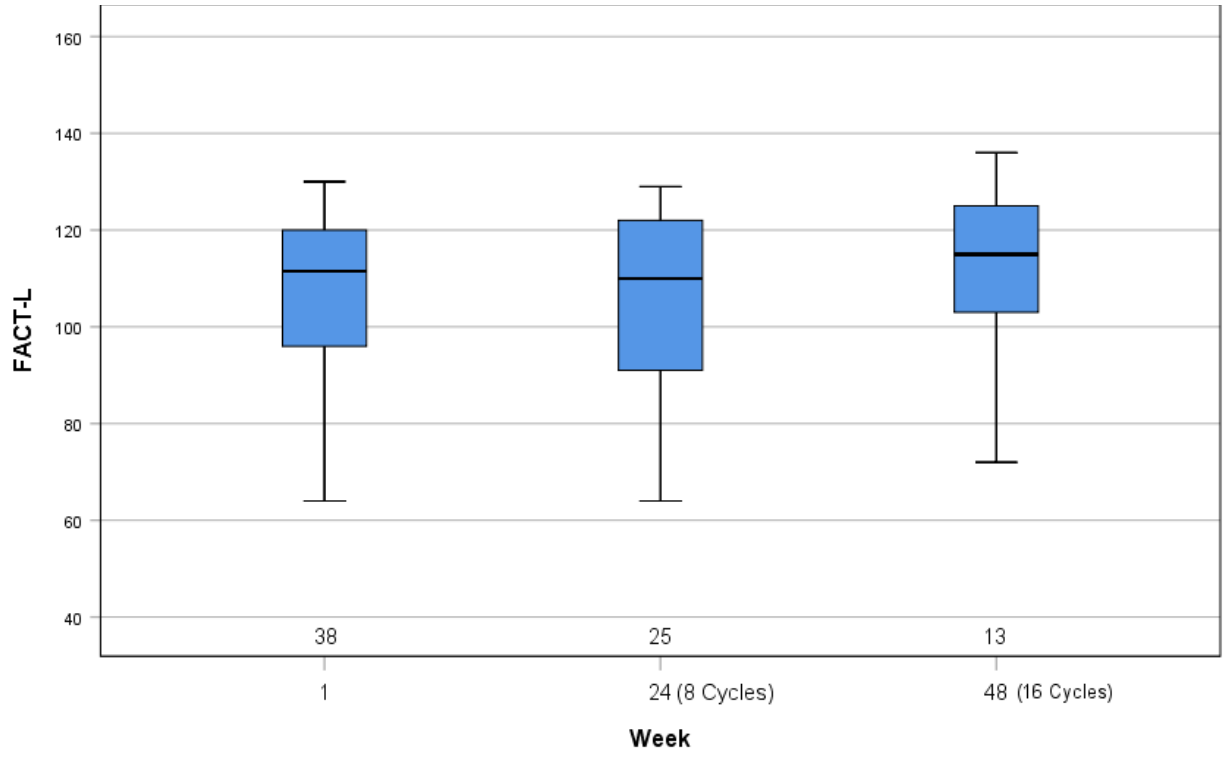

Supplement: jamaoncol-5-1283-s002.pdf [file jamaoncol-5-1283-s002.pdf]
