# Supplementary material
Source: PubMed Central journal article supplement (PMC6624820)
Supplement: jamaoncol-5-1283-s003.pdf [file jamaoncol-5-1283-s003.pdf]

## **Data Sharing Statement**

Bauml. Phase 2 Trial of Pembrolizumab After Completion of Locally Ablative Therapy for Oligometastatic Non-Small Cell Lung Cancer. *JAMA Oncol.* Published July 11, 2019. 10.1001/jamaoncol.2019.1449

### **Data**

**Data available:** No
